# Supplementary material for: Engineering improved bio-jet fuel tolerance in Escherichia coli using a transgenic library from the hydrocarbon-degrader Marinobacter aquaeolei
Source: PubMed Central journal article supplement (PMC4596283; doi:10.1186/s13068-015-0347-3), 2015-10-07
Supplement: 13068_2015_347_MOESM1_ESM.pdf [file 13068_2015_347_MOESM1_ESM.pdf]

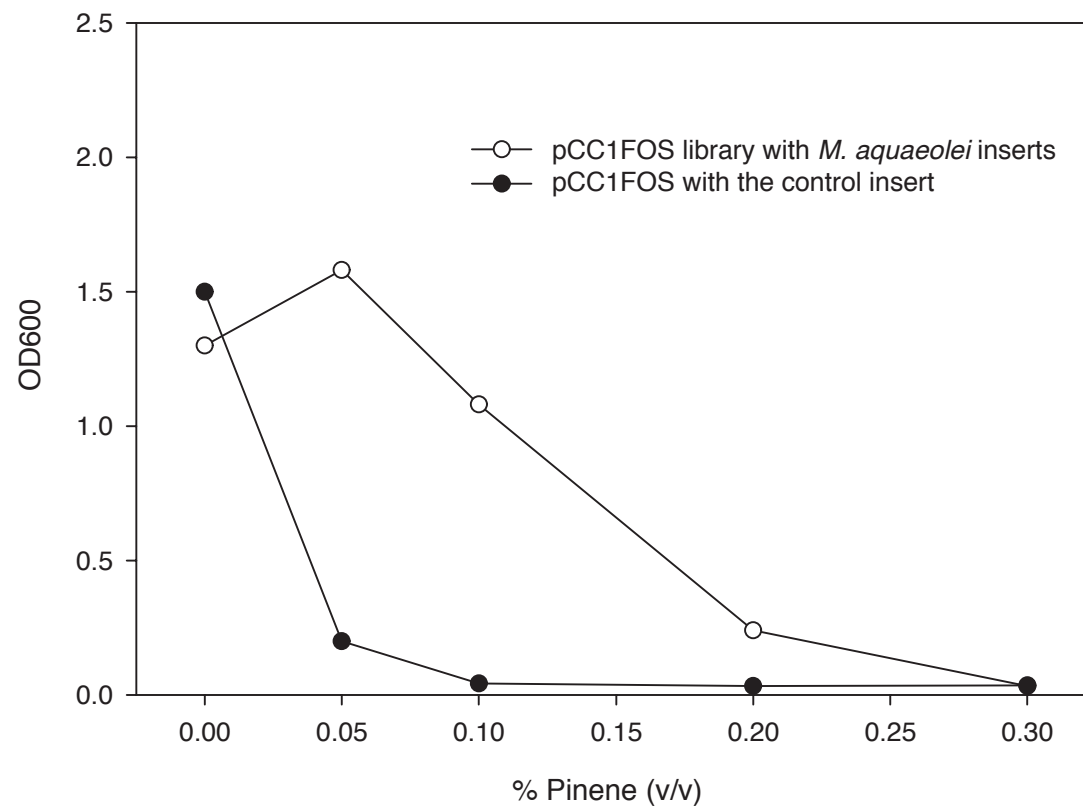

**Figure S1**
